# Supplementary material for: Elevated systolic pulmonary artery pressure is a substantial predictor of increased mortality after transcatheter aortic valve replacement in males, not in females
Source: Springer Nature journal article supplement (doi:10.1007/s00392-023-02307-z), 2023-09-26
Supplement: MOESM1 [file 26089826]

| 5-year mortality<br>sPAP ≥ 50 mmHg<br>Cox Regression Analysis | Univariate             |         | Multivariate            |         |
|---------------------------------------------------------------|------------------------|---------|-------------------------|---------|
|                                                               | Hazard Ratio (95% CI)  | p-value | Hazard Ratio (95% CI)   | p-value |
| Age                                                           | 0.951 (0.713 - 1.268)  | 0.732   |                         |         |
| Gender (male)                                                 | 2.455 (1.240 - 4.861)  | 0.010   | 7.609 (2.857 - 20.268)  | < 0.001 |
| Height                                                        | 1.142 (0.814 - 1.601)  | 0.443   |                         |         |
| Weight                                                        | 1.076 (0.721 - 1.604)  | 0.721   |                         |         |
| BMI                                                           | 0.989 (0.632 - 1.548)  | 0.961   |                         |         |
| NYHA ≥ III                                                    | 0.814 (0.324 - 2.041)  | 0.661   |                         |         |
| STS-Score                                                     | 0.904 (0.518 - 1.579)  | 0.723   |                         |         |
| Diabetes mellitus                                             | 0.860 (0.404 - 1.829)  | 0.696   |                         |         |
| Arterial Hypertension                                         | 1.160 (0.508 - 2.650)  | 0.724   |                         |         |
| CVD                                                           | 0.866 (0.443 - 1.693)  | 0.674   |                         |         |
| Previous myocardial infarction                                | 5.623 (1.680 - 18.815) | 0.005   | 16.235 (3.596 - 73.300) | < 0.001 |
| Atrial fibrillation                                           | 0.441 (0.217 - 0.896)  | 0.024   | 0.384 (0.156 - 0.942)   | 0.037   |
| Previous cardiac surgery                                      | 4.579 (1.864 - 11.247) | 0.001   | 2.128 (0.570 - 7.950)   | 0.262   |
| Pacemaker (before TAVR)                                       | 0.571 (0.078 - 4.167)  | 0.580   |                         |         |
| Malignancy                                                    | 0.440 (0.135 - 1.434)  | 0.173   |                         |         |
| Stroke (before TAVR)                                          | 1.061 (0.325 - 3.461)  | 0.921   |                         |         |
| PAOD                                                          | 0.046 (0.000 - 27.882) | 0.346   |                         |         |
| COPD                                                          | 0.850 (0.300 - 2.404)  | 0.759   |                         |         |
| LVEF                                                          | 0.890 (0.684 - 1.159)  | 0.387   |                         |         |
| LVEDD                                                         | 1.053 (0.679 - 1.632)  | 0.818   |                         |         |
| IVSd                                                          | 0.917 (0.662 - 1.272)  | 0.605   |                         |         |
| AV Vmax                                                       | 0.452 (0.241 - 0.846)  | 0.013   | 0.962 (0.293 - 3.162)   | 0.949   |
| AV dpmax                                                      | 0.736 (0.552 - 0.981)  | 0.037   | 0.524 (0.377 - 0.729)   | < 0.001 |
| AV dpmean                                                     | 0.834 (0.601 - 1.156)  | 0.276   |                         |         |
| TAPSE                                                         | 1.325 (0.844 - 2.080)  | 0.222   |                         |         |
| AVI ≥ II°                                                     | 0.910 (0.351 - 2.358)  | 0.847   |                         |         |
| MVI ≥ II°                                                     | 0.997 (0.516 - 1.924)  | 0.992   |                         |         |
| TVI ≥ II°                                                     | 0.585 (0.286 - 1.195)  | 0.141   |                         |         |
| Creatinine                                                    | 1.000 (0.862 - 1.160)  | 0.996   |                         |         |
| BNP                                                           | 0.978 (0.737 - 1.296)  | 0.875   |                         |         |
| Hkt                                                           | 0.834 (0.604 - 1.151)  | 0.270   |                         |         |
| Hb                                                            | 0.826 (0.598 - 1.139)  | 0.244   |                         |         |
| CK                                                            | 1.223 (0.343 - 4.360)  | 0.756   |                         |         |
| Pacemaker (after TAVR)                                        | 2.071 (0.996 - 4.307)  | 0.051   | 4.413 (1.766 - 11.030)  | 0.001   |
| Vascular complications                                        | 0.547 (0.131 - 2.276)  | 0.407   |                         |         |
| Stroke (after TAVR)                                           | 2.709 (0.643 - 11.418) | 0.174   |                         |         |
