# Supplementary material for: Elevated systolic pulmonary artery pressure is a substantial predictor of increased mortality after transcatheter aortic valve replacement in males, not in females
Source: Springer Nature journal article supplement (doi:10.1007/s00392-023-02307-z), 2023-09-26
Supplement: MOESM2 [file 26089826]

| 5-year mortality<br>sPAP ≥ 40 mmHg<br>Cox Regression Analysis | Univariate             |         | Multivariate           |         |
|---------------------------------------------------------------|------------------------|---------|------------------------|---------|
|                                                               | Hazard Ratio (95% CI)  | p-value | Hazard Ratio (95% CI)  | p-value |
| Age                                                           | 1.030 (0.809 - 1.311)  | 0.811   |                        |         |
| Gender (male)                                                 | 2.350 (1.401 - 3.942)  | 0.001   | 2.555 (1.416 - 4.613)  | 0.002   |
| Height                                                        | 1.257 (0.970 - 1.629)  | 0.084   | 0.726 (0.486 - 1.085)  | 0.119   |
| Weight                                                        | 1.136 (0.874 - 1.477)  | 0.341   |                        |         |
| BMI                                                           | 1.041 (0.785 - 1.380)  | 0.781   |                        |         |
| NYHA ≥ III                                                    | 1.375 (0.697 - 2.715)  | 0.359   |                        |         |
| STS-Score                                                     | 0.930 (0.598 - 1.446)  | 0.748   |                        |         |
| Diabetes mellitus                                             | 0.786 (0.441 - 1.402)  | 0.415   |                        |         |
| Arterial Hypertension                                         | 1.031 (0.538 - 1.973)  | 0.927   |                        |         |
| CVD                                                           | 0.829 (0.497 - 1.381)  | 0.471   |                        |         |
| Previous myocardial infarction                                | 1.011 (0.367 - 2.781)  | 0.983   |                        |         |
| Atrial fibrillation                                           | 0.703 (0.422 - 1.171)  | 0.176   |                        |         |
| Previous cardiac surgery                                      | 5.482 (2.452 - 12.257) | < 0.001 | 8.431 (3.200 - 22.212) | < 0.001 |
| Pacemaker (before TAVR)                                       | 1.064 (0.387 - 2.928)  | 0.905   |                        |         |
| Malignancy                                                    | 0.978 (0.511 - 1.872)  | 0.946   |                        |         |
| Stroke (before TAVR)                                          | 1.405 (0.606 - 3.257)  | 0.428   |                        |         |
| PAOD                                                          | 0.734 (0.267 - 2.020)  | 0.550   |                        |         |
| COPD                                                          | 1.346 (0.685 - 2.644)  | 0.388   |                        |         |
| LVEF                                                          | 0.800 (0.651 - 0.982)  | 0.033   | 0.841 (0.657 - 1.077)  | 0.170   |
| LVEDD                                                         | 1.053 (0.777 - 1.427)  | 0.741   |                        |         |
| IVSd                                                          | 0.821 (0.637 - 1.059)  | 0.129   |                        |         |
| AV Vmax                                                       | 0.828 (0.630 - 1.088)  | 0.175   |                        |         |
| AV dpmax                                                      | 0.785 (0.605 - 1.020)  | 0.070   | 0.755 (0.537 - 1.061)  | 0.106   |
| AV dpmean                                                     | 0.897 (0.698 - 1.153)  | 0.397   |                        |         |
| TAPSE                                                         | 1.105 (0.786 - 1.553)  | 0.567   |                        |         |
| AVI ≥ II°                                                     | 0.973 (0.491 - 1.932)  | 0.939   |                        |         |
| MVI ≥ II°                                                     | 1.165 (0.699 - 1.942)  | 0.557   |                        |         |
| TVI ≥ II°                                                     | 0.800 (0.458 - 1.399)  | 0.434   |                        |         |
| Creatinine                                                    | 1.014 (0.875 - 1.174)  | 0.856   |                        |         |
| BNP                                                           | 1.102 (0.905 - 1.341)  | 0.333   |                        |         |
| Hkt                                                           | 0.886 (0.697 - 1.125)  | 0.320   |                        |         |
| Hb                                                            | 0.910 (0.719 - 1.151)  | 0.429   |                        |         |
| CK                                                            | 1.186 (0.858 - 1.639)  | 0.302   |                        |         |
| Pacemaker (after TAVR)                                        | 1.441 (0.835 - 2.485)  | 0.189   |                        |         |
| Vascular complications                                        | 1.009 (0.460 - 2.213)  | 0.982   |                        |         |
| Stroke (after TAVR)                                           | 3.579 (0.865 - 14.811) | 0.078   | 2.397 (0.402 - 14.306) | 0.338   |
