# Supplementary material for: Elevated systolic pulmonary artery pressure is a substantial predictor of increased mortality after transcatheter aortic valve replacement in males, not in females
Source: Springer Nature journal article supplement (doi:10.1007/s00392-023-02307-z), 2023-09-26
Supplement: MOESM3 [file 26089826]

| 3-year mortality<br>sPAP ≥ 50 mmHg<br>Cox Regression Analysis | Univariate              |         | Multivariate             |         |
|---------------------------------------------------------------|-------------------------|---------|--------------------------|---------|
|                                                               | Hazard Ratio (95% CI)   | p-value | Hazard Ratio (95% CI)    | p-value |
| Age                                                           | 0.974 (0.696 - 1.363)   | 0.878   |                          |         |
| Gender (male)                                                 | 4.303 (1.724 - 10.740)  | 0.002   | 17.035 (3.857 - 75.246)  | < 0.001 |
| Height                                                        | 1.432 (0.958 - 2.139)   | 0.080   | 0.687 (0.377 - 1.251)    | 0.219   |
| Weight                                                        | 1.292 (0.818 - 2.040)   | 0.272   |                          |         |
| BMI                                                           | 1.007 (0.594 - 1.707)   | 0.979   |                          |         |
| NYHA ≥ III                                                    | 0.809 (0.271 - 2.417)   | 0.705   |                          |         |
| STS-Score                                                     | 0.848 (0.438-1.645)     | 0.627   |                          |         |
| Diabetes mellitus                                             | 0.777 (0.312 - 1.936)   | 0.588   |                          |         |
| Arterial Hypertension                                         | 2.102 (0.631 - 7.004)   | 0.226   |                          |         |
| CVD                                                           | 0.891 (0.404 - 1.964)   | 0.775   |                          |         |
| Previous myocardial infarction                                | 3.722 (0.874 - 15.860)  | 0.076   | 21.218 (3.294 - 136.692) | 0.001   |
| Atrial fibrillation                                           | 0.464 (0.202 - 1.069)   | 0.071   | 0.727 (0.395 - 1.338)    | 0.306   |
| Previous cardiac surgery                                      | 5.768 (2.263 - 14.702)  | < 0.001 | 2.958 (0.801 - 10.917)   | 0.104   |
| Pacemaker (before TAVR)                                       | 0.782 (0.106 - 5.777)   | 0.810   |                          |         |
| Malignancy                                                    | 0.416 (0.098 - 1.759)   | 0.233   |                          |         |
| Stroke (before TAVR)                                          | 0.979 (0.231 - 4.144)   | 0.977   |                          |         |
| PAOD                                                          | 0.046 (0.000 - 128.456) | 0.447   |                          |         |
| COPD                                                          | 1.268 (0.437 - 3.682)   | 0.663   |                          |         |
| LVEF                                                          | 0.898 (0.655 - 1.230)   | 0.501   |                          |         |
| LVEDD                                                         | 1.047 (0.616 - 1.778)   | 0.866   |                          |         |
| IVSd                                                          | 1.054 (0.710 - 1.564)   | 0.794   |                          |         |
| AV Vmax                                                       | 0.401 (0.201 - 0.799)   | 0.009   | 0.313 (0.144 - 0.678)    | 0.003   |
| AV dpmax                                                      | 0.773 (0.555 - 1.075)   | 0.126   |                          |         |
| AV dpmean                                                     | 0.763 (0.523 - 1.113)   | 0.161   |                          |         |
| TAPSE                                                         | 1.330 (0.761 - 2.325)   | 0.316   |                          |         |
| AVI ≥ II°                                                     | 0.738 (0.220 - 2.475)   | 0.623   |                          |         |
| MVI ≥ II°                                                     | 0.895 (0.411 - 1.949)   | 0.780   |                          |         |
| TVI ≥ II°                                                     | 0.401 (0.161 - 1.000)   | 0.050   | 0.800 (0.269 - 2.379)    | 0.688   |
| Creatinine                                                    | 0.766 (0.323 - 1.820)   | 0.546   |                          |         |
| BNP                                                           | 1.024 (0.746 - 1.405)   | 0.885   |                          |         |
| Hkt                                                           | 0.932 (0.642 - 1.351)   | 0.709   |                          |         |
| Hb                                                            | 0.892 (0.610 - 1.303)   | 0.554   |                          |         |
| CK                                                            | 0.641 (0.130 - 3.165)   | 0.585   |                          |         |
| Pacemaker (after TAVR)                                        | 2.293 (0.993 - 5.294)   | 0.052   | 5.517 (1.873 - 16.254)   | 0.002   |
| Vascular complications                                        | 0.374 (0.051 - 2.763)   | 0.335   |                          |         |
| Stroke (after TAVR)                                           | 1.424 (0.193 - 10.525)  | 0.729   |                          |         |
