# Supplementary material for: Elevated systolic pulmonary artery pressure is a substantial predictor of increased mortality after transcatheter aortic valve replacement in males, not in females
Source: Springer Nature journal article supplement (doi:10.1007/s00392-023-02307-z), 2023-09-26
Supplement: MOESM4 [file 26089826]

| 3-year mortality<br>sPAP ≥ 40 mmHg<br>Cox Regression Analysis | Univariate             |         | Multivariate           |         |
|---------------------------------------------------------------|------------------------|---------|------------------------|---------|
|                                                               | Hazard Ratio (95% CI)  | p-value | Hazard Ratio (95% CI)  | p-value |
| Age                                                           | 0.952 (0.712 - 1.275)  | 0.743   |                        |         |
| Gender (male)                                                 | 4.007 (1.911 - 8.401)  | < 0.001 | 4.210 (1.843 - 9.618)  | 0.001   |
| Height                                                        | 1.525 (1.095 - 2.124)  | 0.012   | 0.771 (0.470 - 1.264)  | 0.302   |
| Weight                                                        | 1.333 (0.972 - 1.829)  | 0.074   | 1.001 (0.660 - 1.517)  | 0.998   |
| BMI                                                           | 1.107 (0.781 - 1.568)  | 0.568   |                        |         |
| NYHA ≥ III                                                    | 1.433 (0.607 - 3.380)  | 0.412   |                        |         |
| STS-Score                                                     | 0.965 (0.575 - 1.620)  | 0.894   |                        |         |
| Diabetes mellitus                                             | 0.742 (0.354 - 1.554)  | 0.428   |                        |         |
| Arterial Hypertension                                         | 1.520 (0.596 - 3.874)  | 0.380   |                        |         |
| CVD                                                           | 0.841 (0.446 - 1.588)  | 0.594   |                        |         |
| Previous myocardial infarction                                | 0.796 (0.192 - 3.296)  | 0.753   |                        |         |
| Atrial fibrillation                                           | 0.734 (0.389 - 1.386)  | 0.340   |                        |         |
| Previous cardiac surgery                                      | 7.137 (3.095 - 16.455) | < 0.001 | 5.231 (2.143 - 12.769) | < 0.001 |
| Pacemaker (before TAVR)                                       | 0.815 (0.197 - 3.377)  | 0.778   |                        |         |
| Malignancy                                                    | 1.139 (0.526 - 2.467)  | 0.741   |                        |         |
| Stroke (before TAVR)                                          | 1.459 (0.520 - 4.095)  | 0.473   |                        |         |
| PAOD                                                          | 0.896 (0.276 - 2.902)  | 0.854   |                        |         |
| COPD                                                          | 1.498 (0.664 - 3.380)  | 0.331   |                        |         |
| LVEF                                                          | 0.743 (0.580 - 0.951)  | 0.019   | 0.976 (0.720 - 1.324)  | 0.877   |
| LVEDD                                                         | 1.045 (0.714 - 1.529)  | 0.821   |                        |         |
| IVSd                                                          | 0.834 (0.606 - 1.148)  | 0.267   |                        |         |
| AV Vmax                                                       | 0.767 (0.543 - 1.083)  | 0.132   |                        |         |
| AV dpmax                                                      | 0.782 (0.575 - 1.065)  | 0.119   |                        |         |
| AV dpmean                                                     | 0.759 (0.550 - 1.048)  | 0.094   | 0.828 (0.600 - 1.143)  | 0.251   |
| TAPSE                                                         | 1.114 (0.727 - 1.706)  | 0.620   |                        |         |
| AVI ≥ II°                                                     | 0.915 (0.379 - 2.210)  | 0.844   |                        |         |
| MVI ≥ II°                                                     | 1.042 (0.546 - 1.986)  | 0.901   |                        |         |
| TVI ≥ II°                                                     | 0.619 (0.295 - 1.300)  | 0.205   |                        |         |
| Creatinine                                                    | 0.810 (0.401 - 1.637)  | 0.557   |                        |         |
| BNP                                                           | 1.137 (0.913 - 1.415)  | 0.252   |                        |         |
| Hkt                                                           | 0.938 (0.696 - 1.263)  | 0.673   |                        |         |
| Hb                                                            | 0.918 (0.684 - 1.232)  | 0.570   |                        |         |
| CK                                                            | 0.918 (0.465 - 1.810)  | 0.804   |                        |         |
| Pacemaker (after TAVR)                                        | 1.513 (0.772 - 2.966)  | 0.228   |                        |         |
| Vascular complications                                        | 0.620 (0.191 - 2.008)  | 0.425   |                        |         |
| Stroke (after TAVR)                                           | 1.844 (0.253 - 13.429) | 0.546   |                        |         |
