# Supplementary material for: Elevated systolic pulmonary artery pressure is a substantial predictor of increased mortality after transcatheter aortic valve replacement in males, not in females
Source: Springer Nature journal article supplement (doi:10.1007/s00392-023-02307-z), 2023-09-26
Supplement: MOESM5 [file 26089826]

| 1-year mortality<br>sPAP ≥ 50 mmHg<br>Cox Regression Analysis | Univariate                 |         | Multivariable             |         |
|---------------------------------------------------------------|----------------------------|---------|---------------------------|---------|
|                                                               | Hazard Ratio (95% CI)      | p-value | Hazard Ratio (95% CI)     | p-value |
| Age                                                           | 0.796 (0.550 - 1.152)      | 0.226   |                           |         |
| Gender (male)                                                 | 5.885 (1.701 - 20.356)     | 0.005   | 77.954 (5.268 - 1153.475) | 0.002   |
| Height                                                        | 1.697 (1.043 - 2.763)      | 0.033   | 0.973 (0.234 - 4.048)     | 0.970   |
| Weight                                                        | 1.704 (1.014 - 2.862)      | 0.044   | 1.183 (0.536 - 2.611)     | 0.677   |
| BMI                                                           | 1.285 (0.718 - 2.299)      | 0.398   |                           |         |
| NYHA ≥ III                                                    | 0.939 (0.235 - 3.756)      | 0.929   |                           |         |
| STS-Score                                                     | 0.665 (0.299 - 1.476)      | 0.316   |                           |         |
| Diabetes mellitus                                             | 0.755 (0.248 - 2.293)      | 0.620   |                           |         |
| Arterial Hypertension                                         | 2.100 (0.483 - 9.133)      | 0.323   |                           |         |
| CVD                                                           | 0.877 (0.340 - 2.263)      | 0.786   |                           |         |
| Previous myocardial infarction                                | 5.259 (1.195 - 23.142)     | 0.028   | 34.232 (4.152 - 282.267)  | 0.001   |
| Atrial fibrillation                                           | 0.311 (0.102 - 0.946)      | 0.040   | 0.282 (0.067 - 1.191)     | 0.085   |
| Previous cardiac surgery                                      | 5.567 (1.970 - 15.730)     | 0.001   | 0.721 (0.127 - 4.089)     | 0.712   |
| Pacemaker (before TAVR)                                       | 0.046 (0.000 - 895.290)    | 0.542   |                           |         |
| Malignancy                                                    | 0.301 (0.040 - 2.265)      | 0.244   |                           |         |
| Stroke (before TAVR)                                          | 0.689 (0.158 - 3.000)      | 0.620   |                           |         |
| PAOD                                                          | 0.046 (0.000 - 895.290)    | 0.542   |                           |         |
| COPD                                                          | 1.335 (0.386 - 4.615)      | 0.648   |                           |         |
| LVEF                                                          | 0.862 (0.593 - 1.255)      | 0.439   |                           |         |
| LVEDD                                                         | 0.036 (0.000 - 999540.990) | 0.704   |                           |         |
| IVSd                                                          | 1.164 (0.715 - 1.893)      | 0.542   |                           |         |
| AV Vmax                                                       | 0.331 (0.148 - 0.737)      | 0.007   | 1.557 (0.011 - 230.508)   | 0.862   |
| AV dpmax                                                      | 0.700 (0.480 - 1.022)      | 0.065   | 0.394 (0.215 - 0.721)     | 0.003   |
| AV dpmean                                                     | 0.645 (0.407 - 1.020)      | 0.061   | 0.850 (0.292 - 2.476)     | 0.766   |
| TAPSE                                                         | 1.664 (0.797 - 3.474)      | 0.175   |                           |         |
| AVI ≥ II°                                                     | 0.756 (0.172 - 3.326)      | 0.711   |                           |         |
| MVI ≥ II°                                                     | 0.609 (0.229 - 1.624)      | 0.322   |                           |         |
| TVI ≥ II°                                                     | 0.282 (0.082 - 0.973)      | 0.045   | 1.323 (0.196 - 8.928)     | 0.774   |
| Creatinine                                                    | 0.744 (0.208 - 2.657)      | 0.649   |                           |         |
| BNP                                                           | 0.943 (0.627 - 1.419)      | 0.779   |                           |         |
| Hkt                                                           | 0.934 (0.604 - 1.443)      | 0.758   |                           |         |
| Hb                                                            | 0.975 (0.620 - 1.531)      | 0.911   |                           |         |
| CK                                                            | 0.636 (0.91 - 4.445)       | 0.648   |                           |         |
| Pacemaker (after TAVR)                                        | 2.986 (1.154 - 7.728)      | 0.024   | 8.723 (2.135 - 35.644)    | 0.003   |
| Vascular complications                                        | 0.043 (0.000 - 51.328)     | 0.384   |                           |         |
| Stroke (after TAVR)                                           | 0.048 (0.000 - 7948.404)   | 0.620   |                           |         |
