# Supplementary material for: Elevated systolic pulmonary artery pressure is a substantial predictor of increased mortality after transcatheter aortic valve replacement in males, not in females
Source: Springer Nature journal article supplement (doi:10.1007/s00392-023-02307-z), 2023-09-26
Supplement: MOESM6 [file 26089826]

| 1-year mortality<br>sPAP ≥ 40 mmHg<br>Cox Regression Analysis | Univariate                |         | Multivariate           |         |
|---------------------------------------------------------------|---------------------------|---------|------------------------|---------|
|                                                               | Hazard Ratio (95% CI)     | p-value | Hazard Ratio (95% CI)  | p-value |
| Age                                                           | 0.813 (0.575 - 1.148)     | 0.239   |                        |         |
| Gender (male)                                                 | 5.477 (1.879 - 15.965)    | 0.002   | 9.546 (2.218 - 41.096) | 0.002   |
| Height                                                        | 1.676 (1.091 - 2.577)     | 0.019   | 1.026 (0.458 - 2.295)  | 0.951   |
| Weight                                                        | 1.589 (1.078 - 2.342)     | 0.019   | 1.082 (0.659 - 1.776)  | 0.755   |
| BMI                                                           | 1.321 (0.870 - 2.004)     | 0.191   |                        |         |
| NYHA ≥ III                                                    | 1.371 (0.459 - 4.092)     | 0.572   |                        |         |
| STS-Score                                                     | 1.098 (0.612 - 1.969)     | 0.754   |                        |         |
| Diabetes mellitus                                             | 0.852 (0.340 - 2.133)     | 0.732   |                        |         |
| Arterial Hypertension                                         | 1.514 (0.453 - 5.059)     | 0.500   |                        |         |
| CVD                                                           | 0.871 (0.384 - 1.971)     | 0.741   |                        |         |
| Previous myocardial infarction                                | 1.405 (0.331 - 5.959)     | 0.645   |                        |         |
| Atrial fibrillation                                           | 0.607 (0.262 - 1.407)     | 0.245   |                        |         |
| Previous cardiac surgery                                      | 5.823 (2.179 - 15.560)    | < 0.001 | 3.863 (1.291 - 11.555) | 0.016   |
| Pacemaker (before TAVR)                                       | 0.691 (0.094 - 5.111)     | 0.718   |                        |         |
| Malignancy                                                    | 0.882 (0.303 - 2.569)     | 0.818   |                        |         |
| Stroke (before TAVR)                                          | 2.464 (0.845 - 7.183)     | 0.099   | 2.048 (0.575 - 7.296)  | 0.269   |
| PAOD                                                          | 0.479 (0.065 - 3.544)     | 0.471   |                        |         |
| COPD                                                          | 1.741 (0.653 - 4.641)     | 0.267   |                        |         |
| LVEF                                                          | 0.695 (0.514 - 0.940)     | 0.018   | 0.858 (0.548 - 1.344)  | 0.504   |
| LVEDD                                                         | 0.755 (0.365 - 1.565)     | 0.450   |                        |         |
| IVSd                                                          | 0.960 (0.630 - 1.463)     | 0.851   |                        |         |
| AV Vmax                                                       | 0.723 (0.466 - 1.122)     | 0.148   |                        |         |
| AV dpmax                                                      | 0.704 (0.479 - 1.034)     | 0.074   | 0.885 (0.331 - 2.364)  | 0.808   |
| AV dpmean                                                     | 0.672 (0.436 - 1.036)     | 0.072   | 0.707 (0.439 - 1.137)  | 0.152   |
| TAPSE                                                         | 1.022 (0.563 - 1.856)     | 0.943   |                        |         |
| AVI ≥ II°                                                     | 0.474 (0.110 - 2.042)     | 0.316   |                        |         |
| MVI ≥ II°                                                     | 0.767 (0.320 - 1.836)     | 0.551   |                        |         |
| TVI ≥ II°                                                     | 0.546 (0.205 - 1.454)     | 0.226   |                        |         |
| Creatinine                                                    | 0.821 (0.346 - 1.944)     | 0.653   |                        |         |
| BNP                                                           | 1.060 (0.776 - 1.447)     | 0.715   |                        |         |
| Hkt                                                           | 1.023 (0.703 - 1.489)     | 0.904   |                        |         |
| Hb                                                            | 0.990 (0.679 - 1.442)     | 0.958   |                        |         |
| CK                                                            | 0.537 (0.107 - 2.710)     | 0.452   |                        |         |
| Pacemaker (after TAVR)                                        | 1.996 (0.882 - 4.518)     | 0.097   | 1.942 (0.798 - 4.727)  | 0.144   |
| Vascular complications                                        | 0.042 (0.000 - 10.652)    | 0.261   |                        |         |
| Stroke (after TAVR)                                           | 0.049 (0.000 - 72768.288) | 0.677   |                        |         |
